# Supplementary material
Source: Springer Nature journal article supplement (https://www.springermedizin.de/resource/supplementary/12903_2011_194_MOESM2_ESM.pdf/9516332)

### Caries, age 3-6 y

#### Smoothed RR

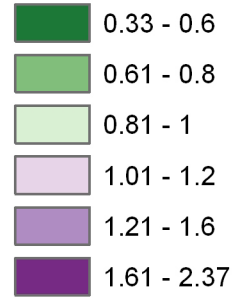

#### Certainty map

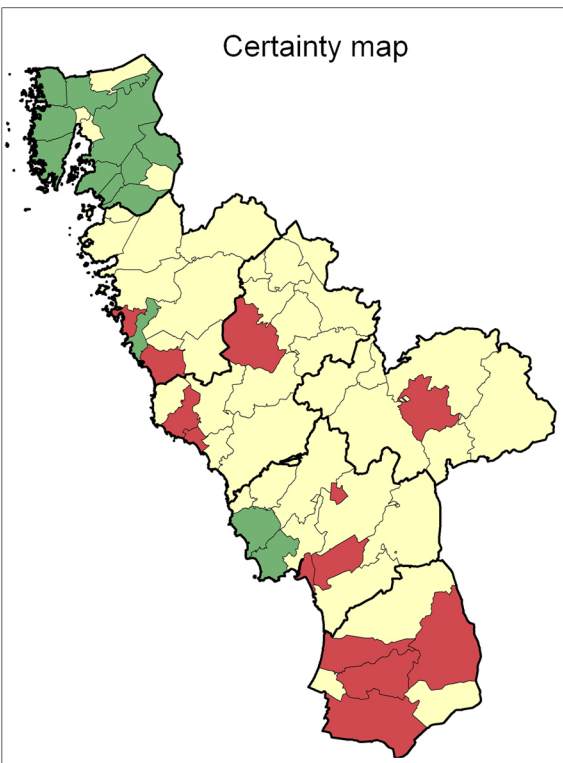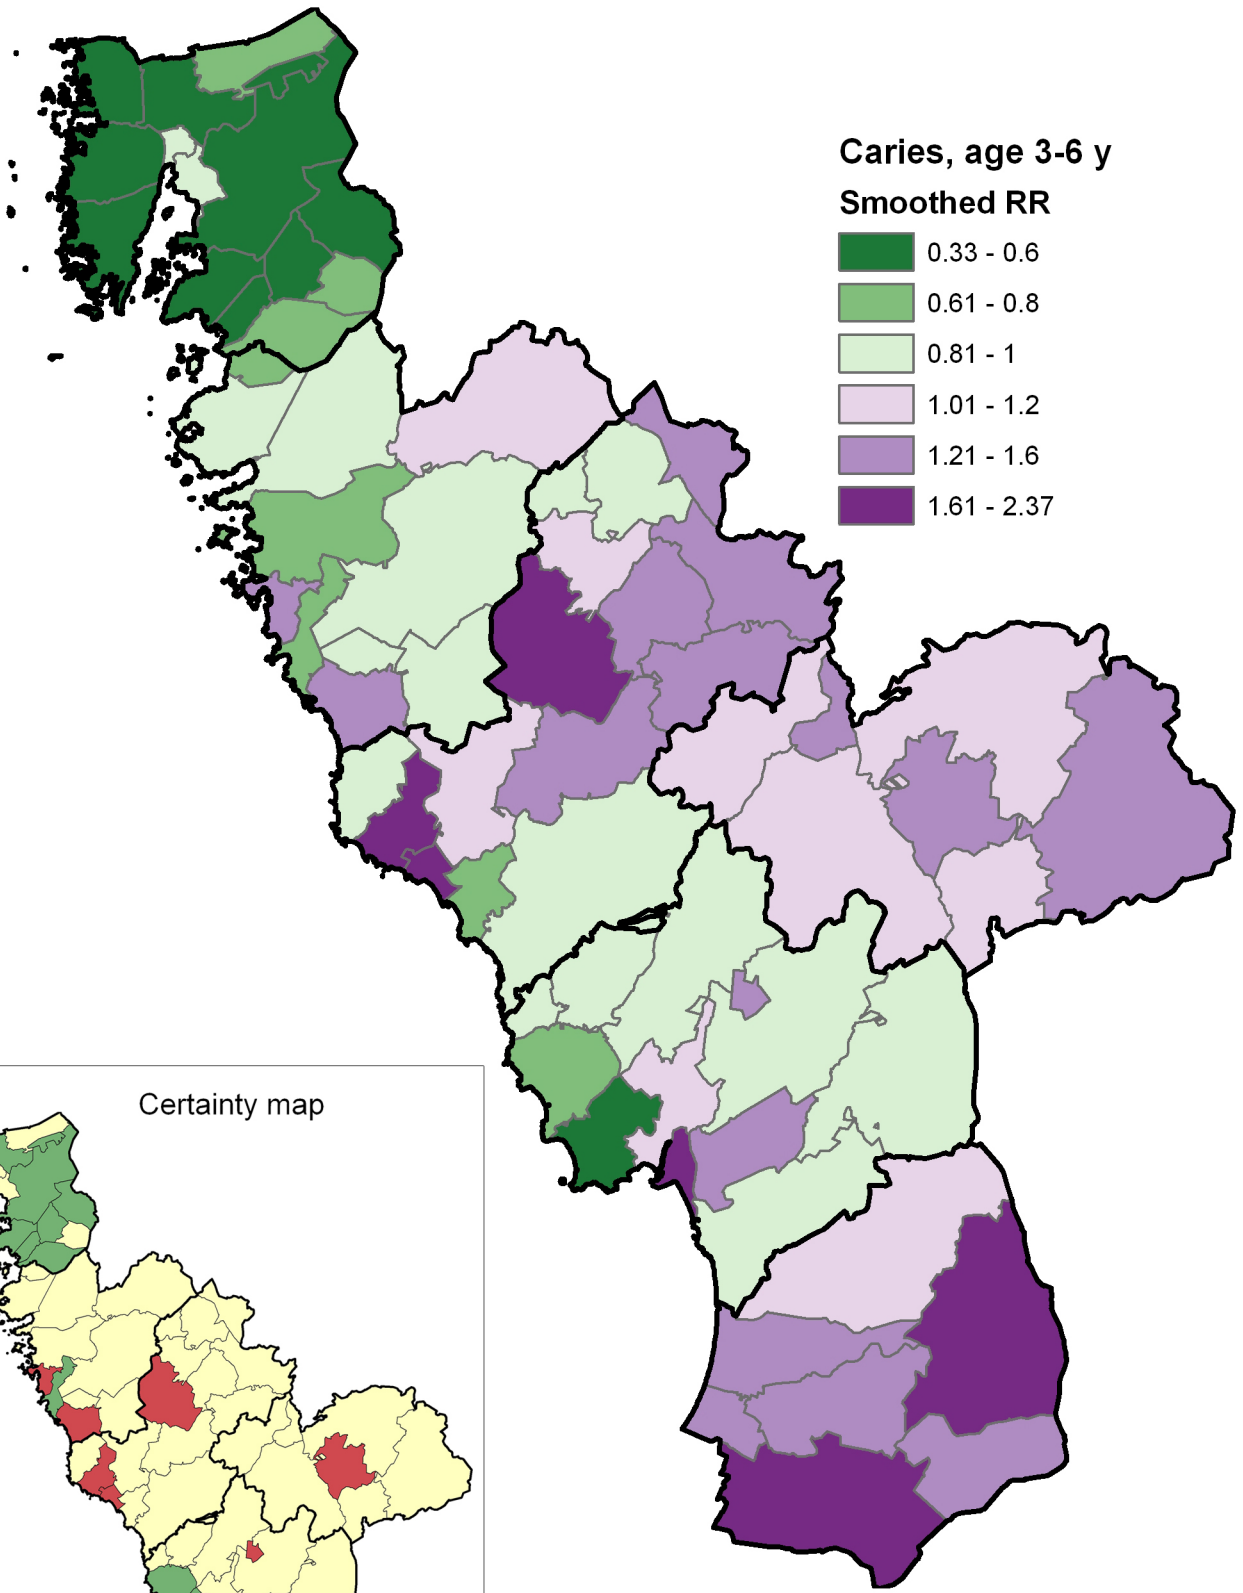

Supplement: MOESM2 [file 9516332]
